# Supplementary material for: Molecular free energy optimization on a computational graph
Source: Royal Society of Chemistry journal article supplement (doi:10.1039/d1ra01455b), 2021-01-01
Supplement: d1ra01455b1.pdf [file d1ra01455b1.pdf]

## Support Information

Xiaoyong Cao<sup>†</sup> and Pu Tian<sup>\*,†,‡</sup>

<sup>†</sup>*School of Life Sciences, Jilin University, Changchun, China 130012*

<sup>‡</sup>*School of Artificial Intelligence, Jilin University, Changchun, China 130012*

E-mail: tianpu@jlu.edu.cn

Phone: +86 (0)431 85155287

1.Coordinates transformation with NeRF (Natural Extension Reference Frame) algorithm:

$$\tilde{c}_k = [r_k \cos(\theta_k), r_k \cos(\psi_k) \sin(\theta_k), r_k \sin(\psi_k) \cos(\theta_k)] \quad (1)$$

$$m_k = c_{k-1} - c_{k-2} \quad (2)$$

$$M_k = \widehat{m}_k, \widehat{m}_k \times \widehat{n}_k, \widehat{n}_k \quad (3)$$

$$c_k = M_k \tilde{c}_k + c_{k-1} \quad (4)$$

Here,  $r_k$  is the bond length between atoms  $k - 1$  and  $k$ ,  $\theta_k$  is the bond angle composed of atoms  $k - 2, k - 1, k$ , and  $\psi_k$  is the dihedral angle of  $k - 2, k - 1$  as the axis of rotation,  $\widehat{m}_k$  the unit vector of  $m_k$ ,  $\times$  is the vector cross product, and  $c_k$  is the cartesian coordinate of the updated  $k$  atom.

Table S1: GSFE-Refinement best of top 5 results for 150-target refined dataset

| ID    | start GDT-HA | $\Delta$ GDT-HA | start RMSD | $\Delta$ RMSD |
|-------|--------------|-----------------|------------|---------------|
| 101m_ | 0.6656       | 0.0146          | 3.9267     | -0.027        |
| 1a00A | 0.6418       | -0.0035         | 16.9914    | 0.0029        |
| 1a07A | 0.7405       | 0.0024          | 3.29       | -0.0044       |
| 1a5v_ | 0.5582       | 0.0034          | 1.8435     | -0.0214       |
| 1afqC | 0.5573       | 0.0078          | 6.2068     | -0.0098       |
| 1at1A | 0.64         | 0.0062          | 6.5628     | -0.0287       |
| 1awqA | 0.5732       | 0.003           | 9.9856     | -0.0217       |
| 1b0b_ | 0.6294       | -0.0017         | 1.837      | -0.0268       |
| 1b11A | 0.542        | -0.0022         | 12.6573    | -0.0301       |
| 1b1cA | 0.6627       | -0.0016         | 5.5089     | -0.0074       |
| 1b66A | 0.5707       | 0               | 0.8874     | -0.0338       |
| 1be9A | 0.5856       | 0.0024          | 5.3811     | -0.012        |
| 1bh5A | 0.531        | 0.0017          | 4.3604     | -0.0173       |
| 1bs4A | 0.5923       | 0.0015          | 5.9913     | -0.02         |
| 1bvqA | 0.5953       | 0.0072          | 4.5375     | -0.0135       |
| 1bzsA | 0.4152       | -0.0016         | 7.6959     | -0.022        |
| 1c9kB | 0.2056       | 0.0027          | 5.0313     | 0.0054        |
| 1ccwA | 0.6004       | 0.0036          | 2.454      | -0.0131       |
| 1cfvH | 0.6366       | 0               | 5.5613     | -0.0291       |
| 1cpq_ | 0.6647       | 0.0117          | 5.7355     | -0.0141       |
| 1cv8_ | 0.3613       | 0               | 3.5176     | -0.003        |
| 1d01D | 0.5685       | 0               | 6.0945     | -0.0368       |
| 1d0iA | 0.3883       | 0.0067          | 4.754      | -0.0419       |
| 1d1jC | 0.5328       | 0.0037          | 5.4926     | -0.0096       |
| 1d2uA | 0.3261       | 0.0027          | 4.994      | -0.0426       |

|       |        |        |         |         |
|-------|--------|--------|---------|---------|
| 1d7bA | 0.1041 | 0.0013 | 2.0833  | -0.0153 |
| 1d8uA | 0.4848 | 0.0016 | 2.8479  | -0.0197 |
| 1ddrA | 0.6368 | 0.0173 | 6.7574  | -0.0177 |
| 1df8A | 0.6229 | 0.0085 | 1.9512  | -0.0144 |
| 1ds7A | 0.5141 | 0.0077 | 2.1074  | -0.012  |
| 1dt1A | 0.3275 | 0.0078 | 1.794   | -0.0247 |
| 1dud_ | 0.5907 | 0.002  | 15.8571 | -0.047  |
| 1dveA | 0.4393 | 0.0093 | 1.1959  | -0.0107 |
| 1dw0A | 0.3281 | 0.0045 | 12.2524 | -0.0144 |
| 1dxpA | 0.2586 | 0.0043 | 11.966  | 0.008   |
| 1dzcA | 0.4522 | 0.0082 | 2.3676  | 0.0009  |
| 1e20A | 0.5176 | 0.0081 | 5.2297  | -0.0219 |
| 1e29A | 0.4222 | 0.0019 | 11.7805 | -0.0348 |
| 1e6iA | 0.7227 | 0      | 5.8339  | -0.0261 |
| 1ejbA | 0.6548 | 0.0014 | 5.8128  | -0.0672 |
| 1elkA | 0.5899 | 0.0065 | 3.8924  | -0.031  |
| 1elrA | 0.6074 | 0.0215 | 1.7917  | -0.0799 |
| 1elwA | 0.6859 | 0.0064 | 1.9984  | -0.0253 |
| 1eqmA | 0.5728 | 0.0031 | 11.3548 | -0.0094 |
| 1eumA | 0.7531 | 0.014  | 1.9421  | 0.0023  |
| 1ew4A | 0.5943 | 0.0024 | 1.857   | -0.015  |
| 1eyhA | 0.5434 | 0.0035 | 3.5525  | -0.0493 |
| 1f71A | 0.5127 | 0.0106 | 1.9146  | -0.0194 |
| 1fdk_ | 0.2581 | -0.002 | 10.8596 | -0.0139 |
| 1ff3A | 0.5262 | 0.0048 | 2.1792  | -0.068  |
| 1fm0D | 0.7067 | 0      | 1.6562  | -0.0126 |
| 1g5tA | 0.4204 | 0.0032 | 6.5559  | -0.0181 |

|       |        |         |         |         |
|-------|--------|---------|---------|---------|
| 1gcvB | 0.6085 | 0.011   | 3.5266  | -0.081  |
| 1goyA | 0.3657 | 0       | 1.6183  | -0.0304 |
| 1gpqA | 0.4528 | 0.0019  | 5.4125  | -0.0131 |
| 1gxuA | 0.5881 | 0.0057  | 1.5192  | -0.0176 |
| 1gy7A | 0.6384 | 0.0124  | 4.0669  | -0.0019 |
| 1h4hA | 0.4782 | 0.0012  | 1.9931  | -0.0642 |
| 1h97A | 0.5408 | 0       | 1.4124  | 0.002   |
| 1hbg_ | 0.5986 | 0.0119  | 6.304   | -0.0138 |
| 1hdoA | 0.5671 | 0.0122  | 2.708   | -0.0462 |
| 1hlb_ | 0.5016 | 0.0143  | 1.4586  | -0.0285 |
| 1hnl_ | 0.2865 | 0.002   | 3.3574  | -0.0286 |
| 1i4sA | 0.449  | 0.0085  | 9.4846  | -0.0421 |
| 1j3wA | 0.5951 | 0.0131  | 2.7615  | 0.0016  |
| 1j77A | 0.4397 | 0.0063  | 3.8841  | -0.0585 |
| 1kafA | 0.2477 | 0.0023  | 3.6507  | -0.0028 |
| 1l9lA | 0.598  | -0.0034 | 2.6332  | 0.0024  |
| 1mk0A | 0.4459 | 0.0077  | 3.4147  | -0.0091 |
| 1mn8A | 0.2474 | 0       | 2.804   | -0.0494 |
| 1nlqA | 0.231  | 0.0047  | 11.5067 | -0.0315 |
| 1nwaA | 0.2411 | 0.0015  | 2.4345  | -0.0875 |
| 1o82A | 0.3036 | 0       | 3.9845  | -0.0081 |
| 1oh0A | 0.628  | 0.008   | 9.0235  | -0.0166 |
| 1ok0A | 0.1824 | 0       | 2.2832  | 0.008   |
| 1oohA | 0.4821 | 0.008   | 2.8792  | -0.0174 |
| 1ou8A | 0.4151 | 0.0024  | 5.0654  | -0.0272 |
| 1ow4A | 0.5479 | 0.0021  | 5.3922  | -0.0106 |
| 1q1fA | 0.625  | 0.0169  | 4.1534  | -0.0291 |

|       |        |         |         |         |
|-------|--------|---------|---------|---------|
| 1q4kA | 0.0788 | 0.0023  | 1.7395  | -0.0002 |
| 1rfyA | 0.618  | 0.0084  | 2.8979  | -0.0364 |
| 1sz7A | 0.4686 | 0.0047  | 8.7317  | -0.0081 |
| 1t1vA | 0.6156 | 0       | 8.2837  | -0.0289 |
| 1t3yA | 0.6221 | 0.0039  | 6.2022  | -0.0147 |
| 1t7dA | 0.0481 | 0       | 2.8585  | -0.0349 |
| 1tkuA | 0.0944 | 0       | 16.7339 | -0.1489 |
| 1tp6A | 0.4206 | 0.004   | 3.0161  | 0.0064  |
| 1tqgA | 0.7214 | 0.0048  | 1.1602  | -0.0205 |
| 1tugB | 0.4118 | 0       | 10.803  | -0.0408 |
| 1tzvA | 0.5177 | 0.0071  | 5.935   | -0.0097 |
| 1u2hA | 0.8021 | 0.0052  | 2.613   | 0.0013  |
| 1u55A | 0.4846 | 0.0126  | 2.4141  | -0.0309 |
| 1u84A | 0.3364 | 0.0031  | 2.9302  | -0.0031 |
| 1ufyA | 0.3417 | 0.0023  | 21.5158 | -0.0354 |
| 1ugiA | 0.1687 | 0       | 1.9191  | 0.0623  |
| 1usqA | 0.3291 | 0.0036  | 13.1353 | -0.004  |
| 1uuyA | 0.6491 | 0.0031  | 6.3911  | -0.0047 |
| 1uxzA | 0.6145 | -0.0019 | 4.1702  | -0.0192 |
| 1w53A | 0.503  | 0.0059  | 1.4101  | -0.0343 |
| 1wlzA | 0.3618 | 0.0029  | 19.0621 | -0.0217 |
| 1wmhA | 0.7289 | 0.003   | 9.198   | -0.0028 |
| 1wmhB | 0.5945 | 0       | 3.616   | -0.0027 |
| 1wpaA | 0.2477 | -0.0024 | 1.3425  | -0.0051 |
| 1wzdA | 0.4641 | 0.0024  | 1.5859  | 0.0076  |
| 1x6iA | 0.5337 | 0.0028  | 3.1087  | -0.0005 |
| 1x91A | 0.7232 | -0.0017 | 6.7188  | -0.0578 |

|       |        |         |         |         |
|-------|--------|---------|---------|---------|
| 1xa8A | 0.2296 | 0       | 13.2079 | -0.0558 |
| 1xmtA | 0.5579 | 0.0026  | 1.5011  | -0.0078 |
| 1xppA | 0.6237 | 0.0051  | 10.4144 | -0.0018 |
| 1y3dI | 0.3906 | 0.0078  | 5.3931  | -0.0326 |
| 1y9tA | 0.2023 | 0       | 1.5181  | -0.0034 |
| 1yd0A | 0.4494 | 0       | 2.3645  | -0.0371 |
| 1z3eB | 0.6607 | 0.0089  | 2.4512  | -0.0033 |
| 2b5aA | 0.776  | 0.013   | 6.9385  | -0.0475 |
| 2bwfA | 0.6461 | 0.0097  | 2.6113  | -0.005  |
| 2c92A | 0.6378 | 0.0034  | 3.1986  | 0.0076  |
| 2cb8A | 0.7674 | 0.0117  | 1.591   | -0.0114 |
| 2chhA | 0.1726 | 0.0022  | 2.2773  | 0.001   |
| 2ev1A | 0.1797 | 0       | 3.5855  | -0.0426 |
| 2fcwA | 0.4646 | 0.0024  | 3.4804  | -0.0177 |
| 2gkgA | 0.7049 | -0.0061 | 3.2566  | -0.0037 |
| 2grrB | 0.2102 | 0.0048  | 5.4023  | -0.0397 |
| 2h7zA | 0.53   | 0.0033  | 8.9504  | -0.0064 |
| 2hl0A | 0.5105 | 0       | 7.5891  | -0.0084 |
| 2ifrA | 0.1176 | 0.0013  | 5.0274  | -0.074  |
| 2ip6A | 0.7328 | 0.0057  | 5.6535  | -0.0169 |
| 2iu5A | 0.2891 | 0.0056  | 7.0724  | -0.023  |
| 2j8wA | 0.5547 | 0.0078  | 3.3315  | -0.0088 |
| 2jekA | 0.1411 | 0       | 1.632   | -0.0005 |
| 2nmlA | 0.205  | 0       | 2.7006  | -0.0192 |
| 2o37A | 0.5556 | 0.0061  | 8.8581  | -0.0286 |
| 2ofcA | 0.2234 | -0.0018 | 1.8955  | 0.0106  |
| 2oznA | 0.3985 | 0.0038  | 4.5841  | -0.0238 |

|       |        |         |         |         |
|-------|--------|---------|---------|---------|
| 2p6wA | 0.2124 | 0.006   | 8.5653  | -0.0531 |
| 2pmrA | 0.727  | 0.0033  | 2.5528  | -0.0423 |
| 2pv2A | 0.6796 | -0.0024 | 4.5033  | -0.0038 |
| 2pvbA | 0.4042 | 0       | 2.0095  | 0.0095  |
| 2rb8A | 0.7957 | 0.0027  | 1.9139  | -0.0008 |
| 2rk3A | 0.5963 | -0.0027 | 2.3792  | -0.0369 |
| 2v2pA | 0.8    | 0.0132  | 1.1419  | 0.0117  |
| 2v33A | 0.1978 | 0.0027  | 2.3929  | -0.011  |
| 2vyyA | 0.4727 | 0.0046  | 7.0412  | -0.01   |
| 2zs0D | 0.6793 | 0.0035  | 8.395   | -0.0025 |
| 3bfoA | 0.7118 | 0.0029  | 2.3744  | 0.0006  |
| 3bqpA | 0.5969 | 0       | 16.4106 | -0.0442 |
| 3bqsA | 0.2824 | 0       | 1.9198  | 0.0053  |
| 3by4A | 0.3939 | 0.0014  | 1.9598  | -0.0237 |
| 3c7mA | 0.4526 | 0.0077  | 11.8375 | -0.0006 |
| 3cjsB | 0.5729 | 0.0174  | 2.2228  | -0.0061 |
| 3d9nA | 0.5543 | 0.0091  | 1.5299  | -0.0188 |
| mean  | -      | 0.0041  | -       | -0.0203 |

Table S2: GSFE-Refinement top 1 results for 150-target refined dataset

| ID    | start GDT-HA | $\Delta$ GDT-HA | start RMSD | $\Delta$ RMSD |
|-------|--------------|-----------------|------------|---------------|
| 101m_ | 0.6656       | 0.0113          | 3.9267     | -0.0189       |
| 1a00A | 0.6418       | 0               | 16.9914    | -0.0037       |
| 1a07A | 0.7405       | 0               | 3.29       | 0.0074        |
| 1a5v_ | 0.5582       | 0               | 1.8435     | -0.013        |
| 1afqC | 0.5573       | -0.0026         | 6.2068     | 0.0095        |
| 1at1A | 0.64         | 0.0012          | 6.5628     | -0.0081       |

|       |        |         |         |         |
|-------|--------|---------|---------|---------|
| 1awqA | 0.5732 | -0.0031 | 9.9856  | -0.0013 |
| 1b0b_ | 0.6294 | -0.0159 | 1.837   | 0.0052  |
| 1b11A | 0.542  | 0       | 12.6573 | -0.0088 |
| 1b1cA | 0.6627 | 0       | 5.5089  | 0.0151  |
| 1b66A | 0.5707 | 0.0036  | 0.8874  | 0.0153  |
| 1be9A | 0.5856 | 0.0024  | 5.3811  | -0.0146 |
| 1bh5A | 0.531  | -0.0016 | 4.3604  | -0.0021 |
| 1bs4A | 0.5923 | 0       | 5.9913  | 0.01    |
| 1bvqA | 0.5953 | 0.0018  | 4.5375  | -0.0093 |
| 1bzsA | 0.4152 | 0       | 7.6959  | -0.0079 |
| 1c9kB | 0.2056 | -0.0014 | 5.0313  | 0.0296  |
| 1ccwA | 0.6004 | -0.0055 | 2.454   | 0.0077  |
| 1cfvH | 0.6366 | -0.0021 | 5.5613  | -0.0122 |
| 1cpq_ | 0.6647 | 0.0058  | 5.7355  | -0.0191 |
| 1cv8_ | 0.3613 | -0.0029 | 3.5176  | 0.0071  |
| 1d01D | 0.5685 | 0       | 6.0945  | 0.017   |
| 1d0iA | 0.3883 | 0       | 4.754   | 0.001   |
| 1d1jC | 0.5328 | 0.0055  | 5.4926  | -0.0115 |
| 1d2uA | 0.3261 | -0.0014 | 4.994   | -0.0026 |
| 1d7bA | 0.1041 | 0.0013  | 2.0833  | 0.0004  |
| 1d8uA | 0.4848 | 0.0031  | 2.8479  | -0.0081 |
| 1ddrA | 0.6368 | 0.0047  | 6.7574  | -0.0026 |
| 1df8A | 0.6229 | 0.0085  | 1.9512  | -0.0011 |
| 1ds7A | 0.5141 | 0       | 2.1074  | 0.0058  |
| 1dt1A | 0.3275 | 0.0058  | 1.794   | 0.0076  |
| 1dud_ | 0.5907 | 0.0061  | 15.8571 | -0.005  |
| 1dveA | 0.4393 | -0.0024 | 1.1959  | 0.0109  |



|       |        |         |         |         |
|-------|--------|---------|---------|---------|
| 1dw0A | 0.3281 | -0.0044 | 12.2524 | 0.0008  |
| 1dxpA | 0.2586 | 0.0014  | 11.966  | 0.0242  |
| 1dzrA | 0.4522 | -0.0014 | 2.3676  | -0.0008 |
| 1e20A | 0.5176 | 0       | 5.2297  | -0.0076 |
| 1e29A | 0.4222 | 0       | 11.7805 | -0.0003 |
| 1e6iA | 0.7227 | -0.0113 | 5.8339  | 0.0343  |
| 1ejbA | 0.6548 | -0.006  | 5.8128  | -0.0151 |
| 1elkA | 0.5899 | 0.0016  | 3.8924  | -0.0276 |
| 1elrA | 0.6074 | 0.0156  | 1.7917  | -0.0894 |
| 1elwA | 0.6859 | -0.0085 | 1.9984  | 0.0374  |
| 1eqmA | 0.5728 | 0.0016  | 11.3548 | 0.0197  |
| 1eumA | 0.7531 | 0       | 1.9421  | -0.0049 |
| 1ew4A | 0.5943 | 0.0048  | 1.857   | -0.0065 |
| 1eyhA | 0.5434 | -0.0035 | 3.5525  | -0.0851 |
| 1f71A | 0.5127 | 0       | 1.9146  | -0.0004 |
| 1fdk_ | 0.2581 | -0.004  | 10.8596 | 0.0076  |
| 1ff3A | 0.5262 | -0.0024 | 2.1792  | 0.0105  |
| 1fm0D | 0.7067 | -0.0034 | 1.6562  | -0.0157 |
| 1g5tA | 0.4204 | 0       | 6.5559  | 0.0004  |
| 1gcvB | 0.6085 | 0.0018  | 3.5266  | -0.009  |
| 1goyA | 0.3657 | 0.0024  | 1.6183  | 0.0001  |
| 1gpqA | 0.4528 | 0.0039  | 5.4125  | -0.0012 |
| 1gxuA | 0.5881 | 0.0057  | 1.5192  | -0.0129 |
| 1gy7A | 0.6384 | 0.0062  | 4.0669  | 0.012   |
| 1h4hA | 0.4782 | -0.0025 | 1.9931  | 0.0015  |
| 1h97A | 0.5408 | 0       | 1.4124  | -0.0064 |
| 1hbg_ | 0.5986 | 0.0102  | 6.304   | -0.0236 |

|       |        |         |         |         |
|-------|--------|---------|---------|---------|
| 1hdoA | 0.5671 | 0.0024  | 2.708   | -0.0048 |
| 1hlb_ | 0.5016 | 0       | 1.4586  | -0.0121 |
| 1hnl_ | 0.2865 | -0.0019 | 3.3574  | 0.0107  |
| 1i4sA | 0.449  | 0.0068  | 9.4846  | -0.0085 |
| 1j3wA | 0.5951 | 0.0094  | 2.7615  | 0.0037  |
| 1j77A | 0.4397 | 0.005   | 3.8841  | 0.0023  |
| 1kafA | 0.2477 | 0.0046  | 3.6507  | 0.0114  |
| 1l9lA | 0.598  | -0.0034 | 2.6332  | 0.0025  |
| 1mk0A | 0.4459 | -0.0052 | 3.4147  | 0.0002  |
| 1mn8A | 0.2474 | -0.0027 | 2.804   | -0.0414 |
| 1nlqA | 0.231  | 0.0023  | 11.5067 | -0.0044 |
| 1nwaA | 0.2411 | 0.0015  | 2.4345  | -0.0059 |
| 1o82A | 0.3036 | 0       | 3.9845  | -0.0014 |
| 1oh0A | 0.628  | 0.008   | 9.0235  | 0.0107  |
| 1ok0A | 0.1824 | -0.0067 | 2.2832  | 0.0202  |
| 1oohA | 0.4821 | 0.004   | 2.8792  | -0.0013 |
| 1ou8A | 0.4151 | 0       | 5.0654  | -0.0295 |
| 1ow4A | 0.5479 | 0.0021  | 5.3922  | -0.0196 |
| 1q1fA | 0.625  | 0.0118  | 4.1534  | -0.0203 |
| 1q4kA | 0.0788 | 0.0012  | 1.7395  | 0.018   |
| 1rfyA | 0.618  | -0.0028 | 2.8979  | -0.001  |
| 1sz7A | 0.4686 | -0.0016 | 8.7317  | 0.014   |
| 1t1vA | 0.6156 | 0.0027  | 8.2837  | -0.0257 |
| 1t3yA | 0.6221 | 0.0039  | 6.2022  | -0.0084 |
| 1t7dA | 0.0481 | 0       | 2.8585  | -0.0319 |
| 1tkuA | 0.0944 | 0       | 16.7339 | -0.0069 |
| 1tp6A | 0.4206 | 0.002   | 3.0161  | 0.0289  |

|       |        |         |         |         |
|-------|--------|---------|---------|---------|
| 1tqgA | 0.7214 | 0.0048  | 1.1602  | -0.0117 |
| 1tugB | 0.4118 | 0       | 10.803  | 0.0133  |
| 1tzvA | 0.5177 | 0       | 5.935   | -0.0118 |
| 1u2hA | 0.8021 | 0       | 2.613   | 0.0007  |
| 1u55A | 0.4846 | 0.0042  | 2.4141  | 0.0006  |
| 1u84A | 0.3364 | 0       | 2.9302  | -0.0032 |
| 1ufyA | 0.3417 | 0.0023  | 21.5158 | 0.0061  |
| 1ugiA | 0.1687 | -0.003  | 1.9191  | 0.0474  |
| 1usqA | 0.3291 | 0.0036  | 13.1353 | 0.0028  |
| 1uuyA | 0.6491 | -0.0031 | 6.3911  | 0.0039  |
| 1uxzA | 0.6145 | 0       | 4.1702  | -0.0058 |
| 1w53A | 0.503  | 0.003   | 1.4101  | -0.0128 |
| 1wlzA | 0.3618 | -0.003  | 19.0621 | -0.0336 |
| 1wmhA | 0.7289 | 0       | 9.198   | 0.0112  |
| 1wmhB | 0.5945 | -0.0061 | 3.616   | 0.0024  |
| 1wpaA | 0.2477 | -0.0047 | 1.3425  | 0.1414  |
| 1wzdA | 0.4641 | 0       | 1.5859  | 0.0075  |
| 1x6iA | 0.5337 | 0       | 3.1087  | 0.0018  |
| 1x91A | 0.7232 | 0.0016  | 6.7188  | -0.0358 |
| 1xa8A | 0.2296 | 0.0025  | 13.2079 | -0.0074 |
| 1xmtA | 0.5579 | 0.0053  | 1.5011  | -0.0077 |
| 1xppA | 0.6237 | -0.0126 | 10.4144 | 0.1296  |
| 1y3dI | 0.3906 | 0.0039  | 5.3931  | -0.0249 |
| 1y9tA | 0.2023 | 0.0022  | 1.5181  | 0.0296  |
| 1yd0A | 0.4494 | -0.0056 | 2.3645  | -0.0069 |
| 1z3eB | 0.6607 | 0.0089  | 2.4512  | -0.0244 |
| 2b5aA | 0.776  | 0.0065  | 6.9385  | -0.004  |

|       |        |         |        |         |
|-------|--------|---------|--------|---------|
| 2bwfA | 0.6461 | 0.0033  | 2.6113 | 0.014   |
| 2c92A | 0.6378 | -0.0017 | 3.1986 | 0.0072  |
| 2cb8A | 0.7674 | 0       | 1.591  | -0.0038 |
| 2chhA | 0.1726 | -0.0022 | 2.2773 | 0.0297  |
| 2ev1A | 0.1797 | 0.0014  | 3.5855 | -0.008  |
| 2fcwA | 0.4646 | 0       | 3.4804 | -0.0136 |
| 2gkgA | 0.7049 | -0.0061 | 3.2566 | -0.0029 |
| 2grrB | 0.2102 | 0.0048  | 5.4023 | -0.0127 |
| 2h7zA | 0.53   | -0.0067 | 8.9504 | 0.0084  |
| 2hl0A | 0.5105 | 0       | 7.5891 | 0.012   |
| 2ifrA | 0.1176 | 0.0013  | 5.0274 | 0.0034  |
| 2ip6A | 0.7328 | 0.0028  | 5.6535 | 0.0104  |
| 2iu5A | 0.2891 | 0.0014  | 7.0724 | -0.0131 |
| 2j8wA | 0.5547 | 0.0019  | 3.3315 | -0.0211 |
| 2jekA | 0.1411 | -0.0018 | 1.632  | -0.0091 |
| 2nmlA | 0.205  | 0.0025  | 2.7006 | 0.0044  |
| 2o37A | 0.5556 | 0.0123  | 8.8581 | -0.0356 |
| 2ofcA | 0.2234 | -0.0018 | 1.8955 | 0.0123  |
| 2oznA | 0.3985 | -0.0019 | 4.5841 | -0.002  |
| 2p6wA | 0.2124 | -0.0012 | 8.5653 | 0.0246  |
| 2pmrA | 0.727  | 0       | 2.5528 | 0.0046  |
| 2pv2A | 0.6796 | 0.0073  | 4.5033 | -0.0095 |
| 2pvbA | 0.4042 | -0.0023 | 2.0095 | 0.0169  |
| 2rb8A | 0.7957 | 0       | 1.9139 | -0.0047 |
| 2rk3A | 0.5963 | -0.0027 | 2.3792 | 0.0209  |
| 2v2pA | 0.8    | 0.0029  | 1.1419 | 0.0013  |
| 2v33A | 0.1978 | 0.0082  | 2.3929 | -0.0045 |

|       |        |         |         |         |
|-------|--------|---------|---------|---------|
| 2vyyA | 0.4727 | 0.0023  | 7.0412  | 0.0048  |
| 2zs0D | 0.6793 | -0.0034 | 8.395   | -0.0017 |
| 3bfoA | 0.7118 | 0       | 2.3744  | 0.0006  |
| 3bqpA | 0.5969 | 0.0031  | 16.4106 | 0.0045  |
| 3bqsA | 0.2824 | 0       | 1.9198  | -0.0101 |
| 3by4A | 0.3939 | -0.0015 | 1.9598  | 0.0131  |
| 3c7mA | 0.4526 | 0       | 11.8375 | -0.005  |
| 3cjsB | 0.5729 | 0.007   | 2.2228  | -0.0123 |
| 3d9nA | 0.5543 | 0.0055  | 1.5299  | -0.0182 |
| mean  | -      | 0.0008  | -       | -0.0003 |

---

Table S3: GSFE-Refinement best of top 5 results for CASP12 dataset

| ID    | start GDT-HA | $\Delta$ GDT-HA | start RMSD | $\Delta$ RMSD |
|-------|--------------|-----------------|------------|---------------|
| TR520 | 0.581        | -0.0031         | 3.9267     | -0.0012       |
| TR594 | 0.3427       | 0               | 16.9914    | -0.0057       |
| TR862 | 0.4032       | 0.0027          | 3.29       | -0.0449       |
| TR866 | 0.55         | 0               | 1.8435     | -0.0181       |
| TR868 | 0.5733       | 0.0043          | 6.2068     | -0.006        |
| TR869 | 0.2885       | 0               | 6.5628     | -0.004        |
| TR870 | 0.2276       | 0.0021          | 9.9856     | -0.0051       |
| TR872 | 0.5682       | 0               | 1.837      | -0.021        |
| TR877 | 0.4894       | 0.0053          | 12.6573    | -0.0319       |
| TR879 | 0.6352       | -0.0079         | 5.5089     | -0.0899       |
| TR882 | 0.6899       | 0.0031          | 0.8874     | -0.034        |
| TR884 | 0.4401       | 0.0036          | 5.3811     | -0.0155       |
| TR885 | 0.7412       | 0               | 4.3604     | -0.0135       |
| TR891 | 0.7567       | 0.0022          | 5.9913     | -0.0003       |
| TR893 | 0.6908       | 0.0015          | 4.5375     | -0.0094       |
| TR894 | 0.5463       | 0               | 7.6959     | -0.0095       |
| TR895 | 0.5146       | 0.0042          | 5.0313     | -0.0721       |
| TR896 | 0.468        | 0.0029          | 2.454      | -0.0065       |
| TR898 | 0.2524       | 0.0023          | 5.5613     | -0.0148       |
| TR905 | 0.3244       | 0.0051          | 5.7355     | -0.0421       |
| TR909 | 0.4264       | -0.003          | 3.5176     | -0.0336       |
| TR913 | 0.4534       | -0.003          | 6.0945     | -0.0429       |
| TR917 | 0.6535       | 0.0211          | 4.754      | -0.0668       |
| TR920 | 0.6039       | 0.0023          | 5.4926     | -0.0238       |
| TR921 | 0.4801       | 0.0036          | 4.994      | -0.0093       |
| TR922 | 0.6791       | 0.0067          | 2.0833     | -0.0078       |
| TR928 | 0.4274       | 0.0059          | 2.8479     | -0.0215       |
| TR944 | 0.5603       | 0.002           | 6.7574     | -0.0275       |
| TR945 | 0.4113       | -0.002          | 1.9512     | -0.0604       |
| TR947 | 0.5157       | 0.0143          | 2.1074     | -0.0456       |
| TR948 | 0.5956       | 0.0084          | 1.794      | -0.0105       |
| mean  | -            | 0.0027          | -          | -0.0146       |

Table S4: GSFE-Refinement top 1 results for CASP12 dataset

| ID    | start GDT-HA | $\Delta$ GDT-HA | start RMSD | $\Delta$ RMSD |
|-------|--------------|-----------------|------------|---------------|
| TR520 | 0.581        | -0.0062         | 3.9267     | -0.0012       |
| TR594 | 0.3427       | 0               | 16.9914    | 0.0046        |
| TR862 | 0.4032       | 0               | 3.29       | 0.0209        |
| TR866 | 0.55         | -0.0065         | 1.8435     | 0.0012        |
| TR868 | 0.5733       | 0.0043          | 6.2068     | 0.0029        |
| TR869 | 0.2885       | 0               | 6.5628     | -0.0035       |
| TR870 | 0.2276       | -0.002          | 9.9856     | 0.0198        |
| TR872 | 0.5682       | 0               | 1.837      | 0.0052        |
| TR877 | 0.4894       | -0.0052         | 12.6573    | 0.007         |
| TR879 | 0.6352       | -0.0079         | 5.5089     | 0.0764        |
| TR882 | 0.6899       | 0               | 0.8874     | 0.0154        |
| TR884 | 0.4401       | 0.0036          | 5.3811     | -0.0143       |
| TR885 | 0.7412       | -0.0044         | 4.3604     | -0.0135       |
| TR891 | 0.7567       | 0.0022          | 5.9913     | -0.0003       |
| TR893 | 0.6908       | 0               | 4.5375     | 0.0084        |
| TR894 | 0.5463       | -0.0046         | 7.6959     | 0.0031        |
| TR895 | 0.5146       | -0.0063         | 5.0313     | 0.0438        |
| TR896 | 0.468        | 0.0029          | 2.454      | 0.0012        |
| TR898 | 0.2524       | 0               | 5.5613     | -0.0001       |
| TR905 | 0.3244       | 0.0051          | 5.7355     | -0.0421       |
| TR909 | 0.4264       | -0.003          | 3.5176     | 0.015         |
| TR913 | 0.4534       | -0.0089         | 6.0945     | -0.0429       |
| TR917 | 0.6535       | -0.0269         | 4.754      | 0.0792        |
| TR920 | 0.6039       | 0.0023          | 5.4926     | -0.0213       |
| TR921 | 0.4801       | -0.0091         | 4.994      | 0.0197        |
| TR922 | 0.6791       | 0.0033          | 2.0833     | 0.0039        |
| TR928 | 0.4274       | -0.0146         | 2.8479     | 0.0557        |
| TR944 | 0.5603       | -0.001          | 6.7574     | -0.0243       |
| TR945 | 0.4113       | -0.0206         | 1.9512     | 0.0684        |
| TR947 | 0.5157       | -0.0086         | 2.1074     | -0.0456       |
| TR948 | 0.5956       | -0.0033         | 1.794      | 0.0136        |
| mean  | -            | -0.0037         | -          | 0.0083        |

Table S5: GSFE-Refinement best of top 5 results for CASP11 dataset

| ID    | start GDT-HA | $\Delta$ GDT-HA | start RMSD | $\Delta$ RMSD |
|-------|--------------|-----------------|------------|---------------|
| TR217 | 0.644        | 0.0072          | 3.9267     | -0.0128       |
| TR228 | 0.5476       | 0               | 16.9914    | -0.0325       |
| TR274 | 0.2896       | 0.0041          | 3.29       | -0.0186       |
| TR280 | 0.5938       | 0               | 1.8435     | -0.0266       |
| TR283 | 0.4119       | 0.0128          | 6.2068     | -0.0038       |
| TR759 | 0.4395       | 0               | 6.5628     | -0.0176       |
| TR762 | 0.7043       | 0.001           | 9.9856     | -0.0168       |
| TR765 | 0.5789       | 0.0033          | 1.837      | -0.0136       |
| TR768 | 0.6381       | 0.0035          | 12.6573    | -0.0175       |
| TR769 | 0.5851       | 0               | 5.5089     | 0.0079        |
| TR772 | 0.524        | 0               | 0.8874     | -0.0062       |
| TR774 | 0.3767       | 0.005           | 5.3811     | -0.0105       |
| TR776 | 0.6279       | 0.0148          | 4.3604     | -0.0103       |
| TR780 | 0.5395       | 0               | 5.9913     | -0.0083       |
| TR782 | 0.6477       | 0.0046          | 4.5375     | -0.0207       |
| TR783 | 0.573        | 0               | 7.6959     | -0.0184       |
| TR786 | 0.4781       | 0               | 5.0313     | -0.0155       |
| TR792 | 0.5813       | 0.0062          | 2.454      | -0.0145       |
| TR795 | 0.5864       | 0               | 5.5613     | 0.0078        |
| TR803 | 0.3321       | 0.0037          | 5.7355     | 0.005         |
| TR810 | 0.54         | -0.0044         | 3.5176     | -0.0269       |
| TR811 | 0.7331       | -0.002          | 6.0945     | 0.0023        |
| TR816 | 0.5221       | -0.0037         | 4.754      | -0.0143       |
| TR821 | 0.4833       | 0.0128          | 5.4926     | -0.0059       |
| TR822 | 0.3026       | 0.0044          | 4.994      | -0.0047       |
| TR827 | 0.3394       | 0.009           | 2.0833     | -0.048        |
| TR828 | 0.4881       | 0.0059          | 2.8479     | -0.0255       |
| TR829 | 0.5037       | 0               | 6.7574     | -0.0065       |
| TR833 | 0.6134       | -0.0023         | 1.9512     | -0.0206       |
| TR837 | 0.4339       | 0               | 2.1074     | -0.0485       |
| TR848 | 0.5815       | -0.0018         | 1.794      | -0.0267       |
| TR854 | 0.5857       | 0.0036          | 15.8571    | -0.0189       |
| TR856 | 0.6148       | 0               | 1.1959     | -0.0012       |
| TR857 | 0.3307       | 0.0052          | 12.2524    | -0.0066       |
| mean  | -            | 0.0027          | -          | -0.0145       |



Table S6: GSFE-Refinement top 1 results for CASP11 dataset

| ID    | start GDT-HA | $\Delta$ GDT-HA | start RMSD | $\Delta$ RMSD |
|-------|--------------|-----------------|------------|---------------|
| TR217 | 0.644        | 0.006           | 3.9267     | -0.0096       |
| TR228 | 0.5476       | -0.0059         | 16.9914    | -0.0356       |
| TR274 | 0.2896       | 0               | 3.29       | 0.0016        |
| TR280 | 0.5938       | 0.0026          | 1.8435     | -0.0213       |
| TR283 | 0.4119       | 0.0032          | 6.2068     | -0.0031       |
| TR759 | 0.4395       | 0.004           | 6.5628     | 0.0009        |
| TR762 | 0.7043       | 0.0039          | 9.9856     | -0.0057       |
| TR765 | 0.5789       | 0.0033          | 1.837      | -0.0067       |
| TR768 | 0.6381       | 0.0018          | 12.6573    | -0.0059       |
| TR769 | 0.5851       | 0.0025          | 5.5089     | -0.0004       |
| TR772 | 0.524        | -0.0013         | 0.8874     | 0.002         |
| TR774 | 0.3767       | 0.0033          | 5.3811     | -0.0065       |
| TR776 | 0.6279       | 0.0045          | 4.3604     | -0.0026       |
| TR780 | 0.5395       | 0.0052          | 5.9913     | 0.0069        |
| TR782 | 0.6477       | -0.0022         | 4.5375     | -0.0067       |
| TR783 | 0.573        | 0               | 7.6959     | 0.0106        |
| TR786 | 0.4781       | -0.0034         | 5.0313     | 0.0006        |
| TR792 | 0.5813       | 0.0031          | 2.454      | -0.0143       |
| TR795 | 0.5864       | -0.0055         | 5.5613     | 0.009         |
| TR803 | 0.3321       | 0.0019          | 5.7355     | 0.02          |
| TR810 | 0.54         | 0.0011          | 3.5176     | -0.0113       |
| TR811 | 0.7331       | 0.001           | 6.0945     | 0.0005        |
| TR816 | 0.5221       | -0.0074         | 4.754      | -0.0018       |
| TR821 | 0.4833       | -0.0019         | 5.4926     | 0.0031        |
| TR822 | 0.3026       | 0.0022          | 4.994      | -0.0089       |
| TR827 | 0.3394       | 0.0065          | 2.0833     | -0.0456       |
| TR828 | 0.4881       | 0.0059          | 2.8479     | -0.009        |
| TR829 | 0.5037       | 0               | 6.7574     | 0.0016        |
| TR833 | 0.6134       | -0.0046         | 1.9512     | 0.0015        |
| TR837 | 0.4339       | 0.0041          | 2.1074     | -0.0289       |
| TR848 | 0.5815       | 0               | 1.794      | -0.0016       |
| TR854 | 0.5857       | 0.0107          | 15.8571    | -0.0151       |
| TR856 | 0.6148       | 0               | 1.1959     | -0.008        |
| TR857 | 0.3307       | 0.0026          | 12.2524    | -0.0018       |
| mean  | -            | 0.0014          | -          | -0.0056       |

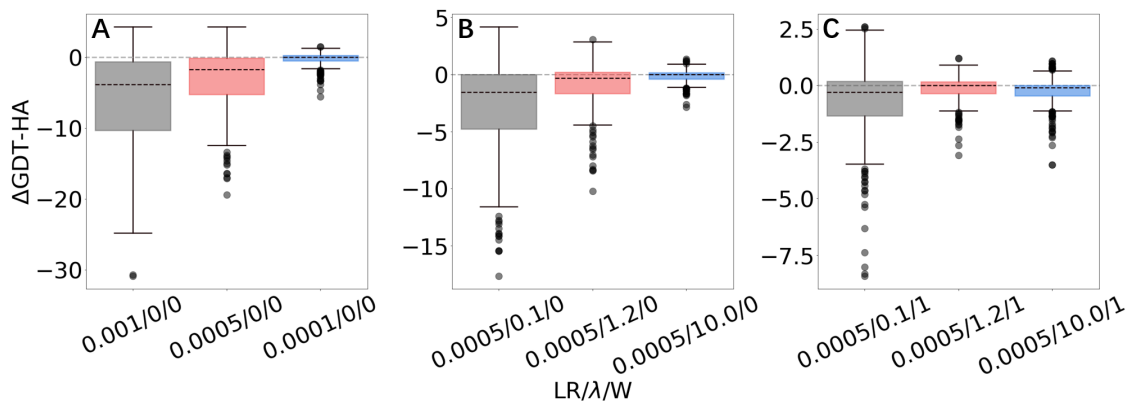

Figure S1:  $\Delta$ GDT-HA of top 1 models by GFSE-Refinement for various  $/LR/\lambda/W$  combinations on 3DRobot dataset

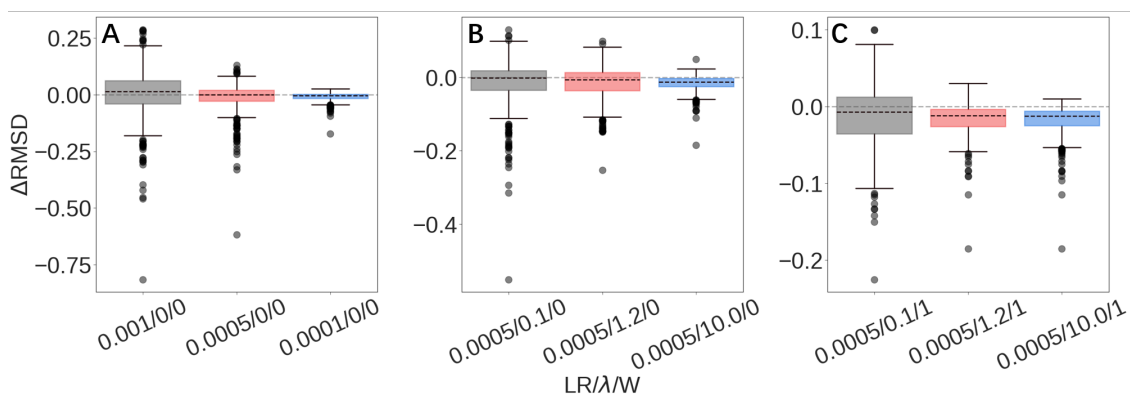

Figure S2:  $\Delta$ RMSD of best of top 5 models by GFSE-Refinement for various  $/LR/\lambda/W$  combinations on 3DRobot dataset

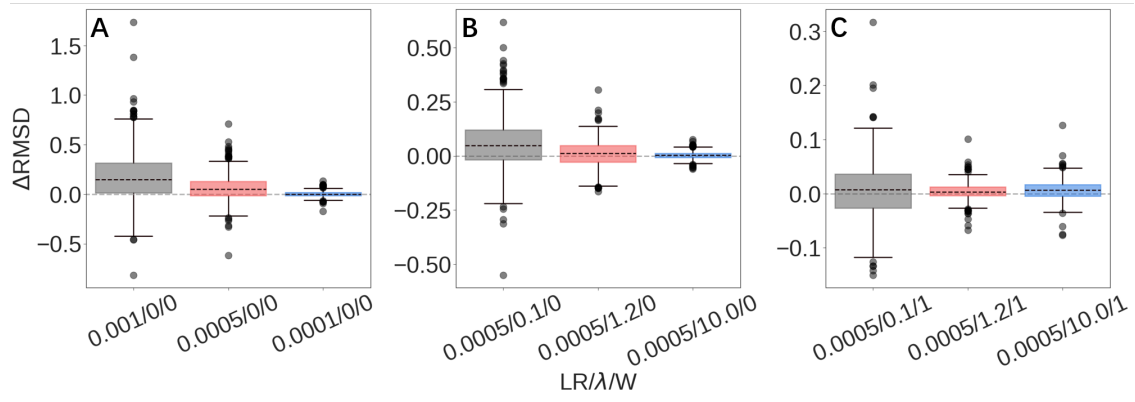

Figure S3:  $\Delta\text{RMSD}$  of top 1 models by GFSE-Refinement for various  $\text{LR}/\lambda/\text{W}$  combinations on 3DRobot dataset

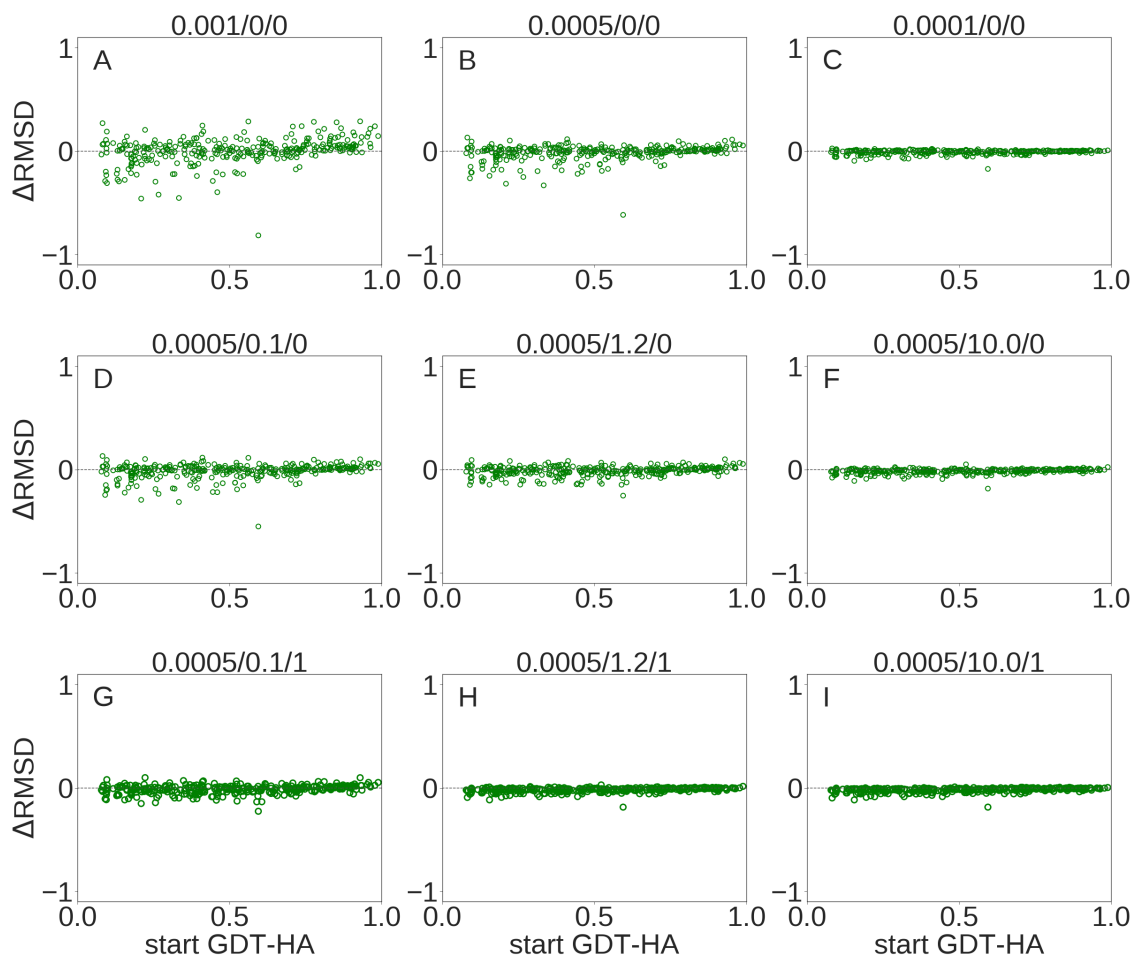

Figure S4: Scatter plots of  $\Delta\text{RMSD}$  as a function of start GDT-HA for best of top 5 models by GSFE-Refinement for various /LR/ $\lambda$ /W combinations on 3DRobot dataset

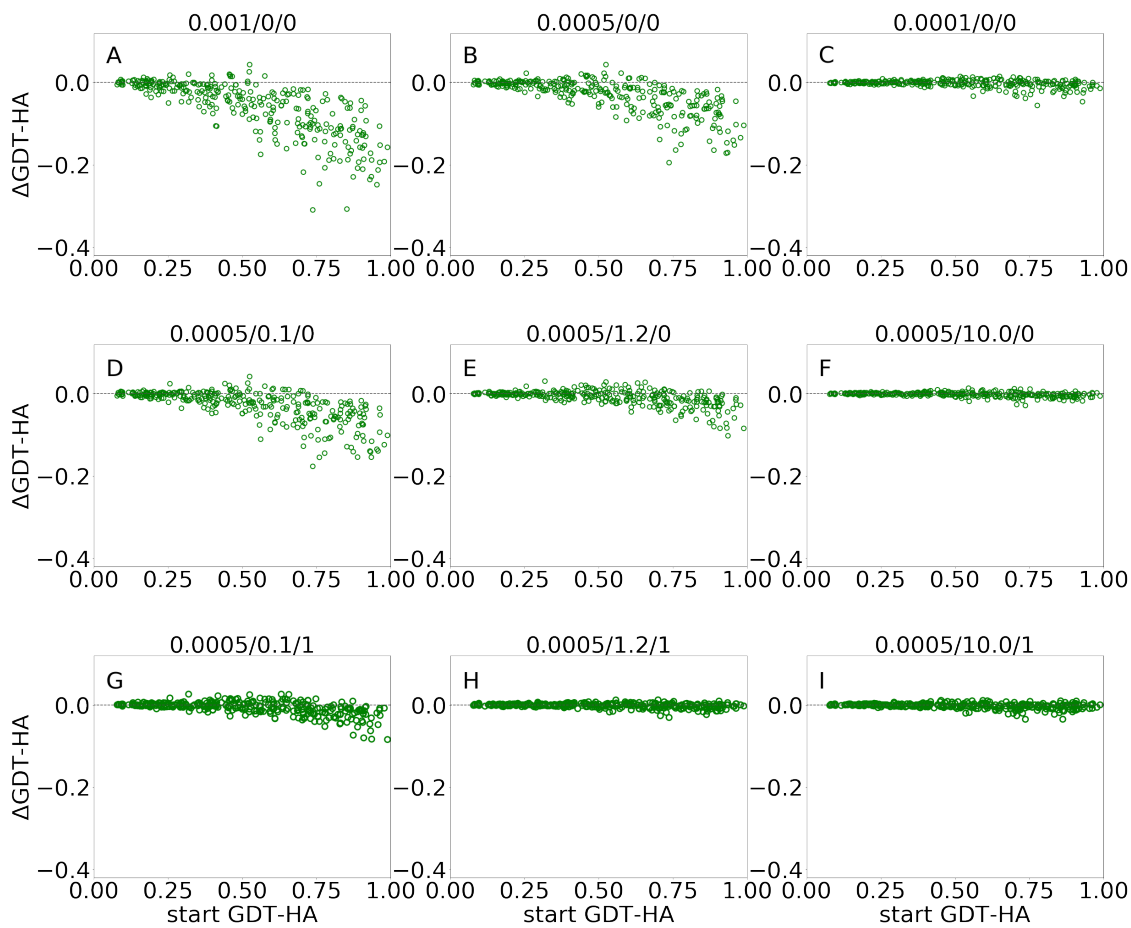

Figure S5: Scatter plots of  $\Delta\text{GDT-HA}$  as a function of start GDT-HA for top 1 models by GSFE-Refinement for various  $LR/\lambda/W$  combinations on 3DRobot dataset

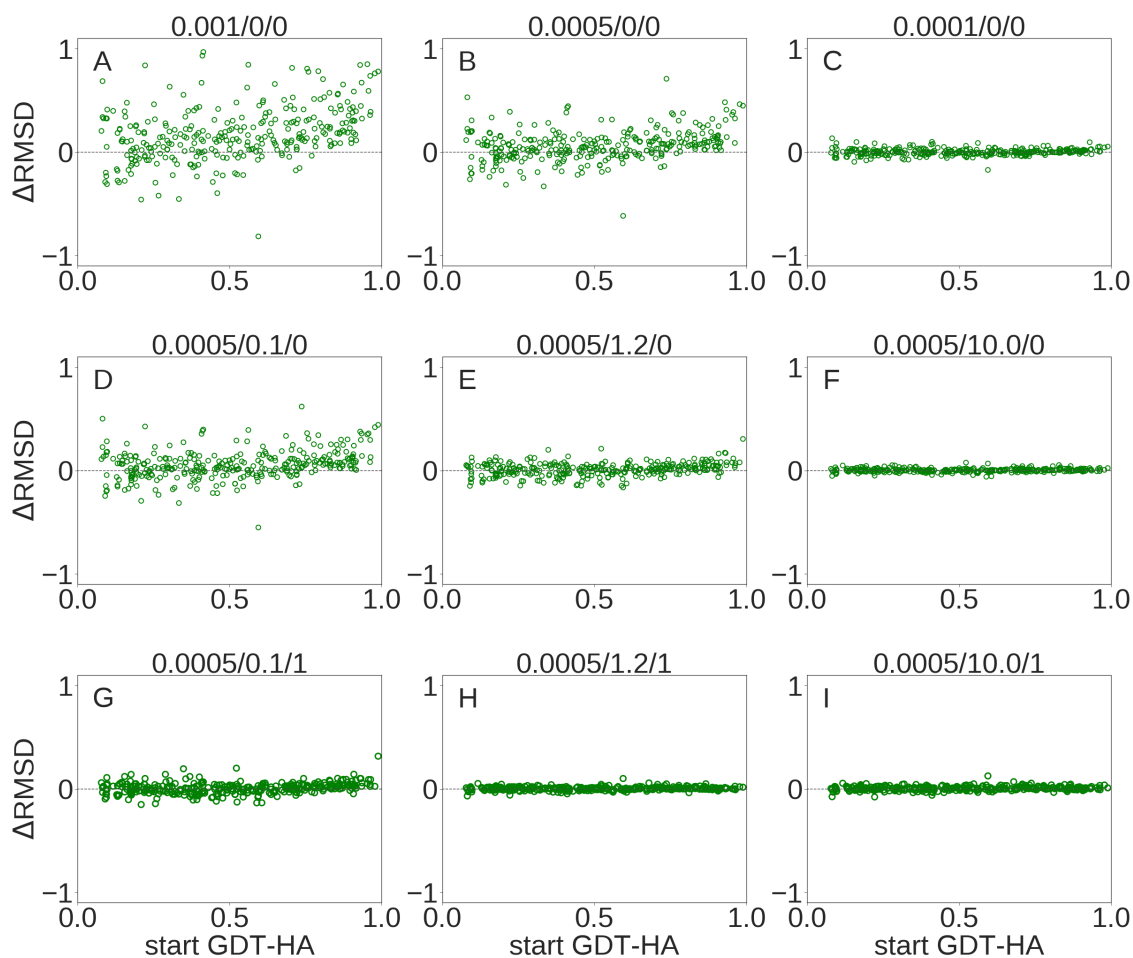

Figure S6: Scatter plots of  $\Delta\text{RMSD}$  as a function of start GDT-HA for top 1 models by GSFE-Refinement for various /LR/ $\lambda$ /W combinations on 3DRobot dataset

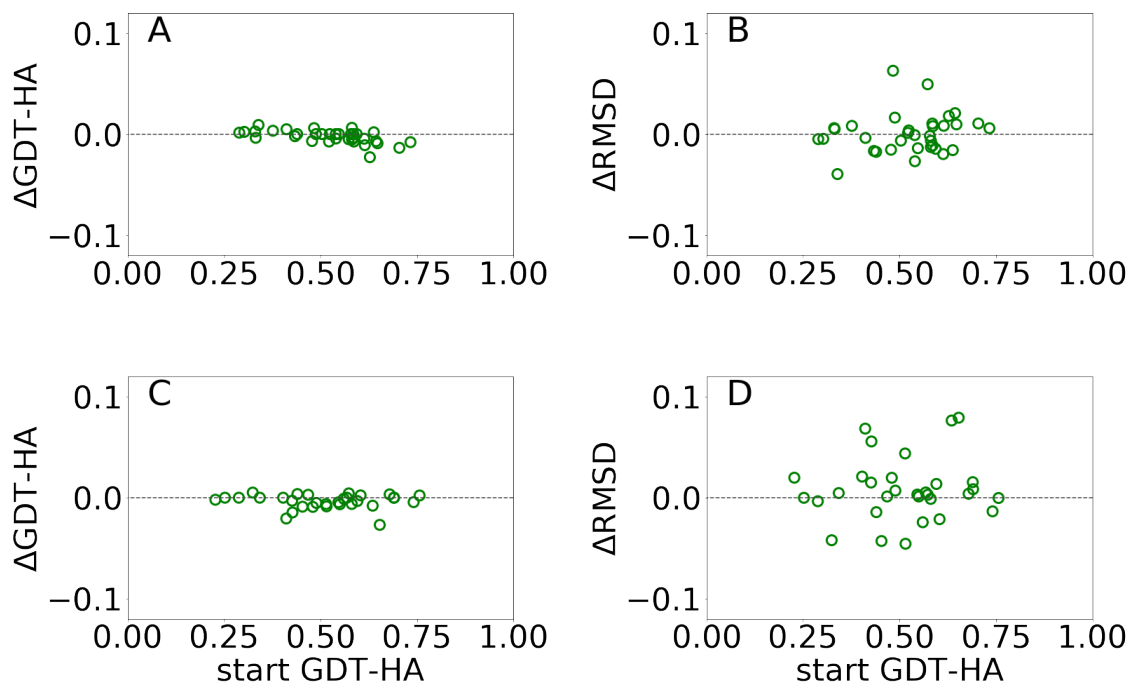

Figure S7: Scatter plots of  $\Delta\text{GDT-HA}$  (A,C),  $\Delta\text{RMSD}$  (B,D) as a function of start GDT-HA for top 1 models by GSFE-Refinement for various /LR/ $\lambda$ /W combinations on CASP11 and CASP12 dataset

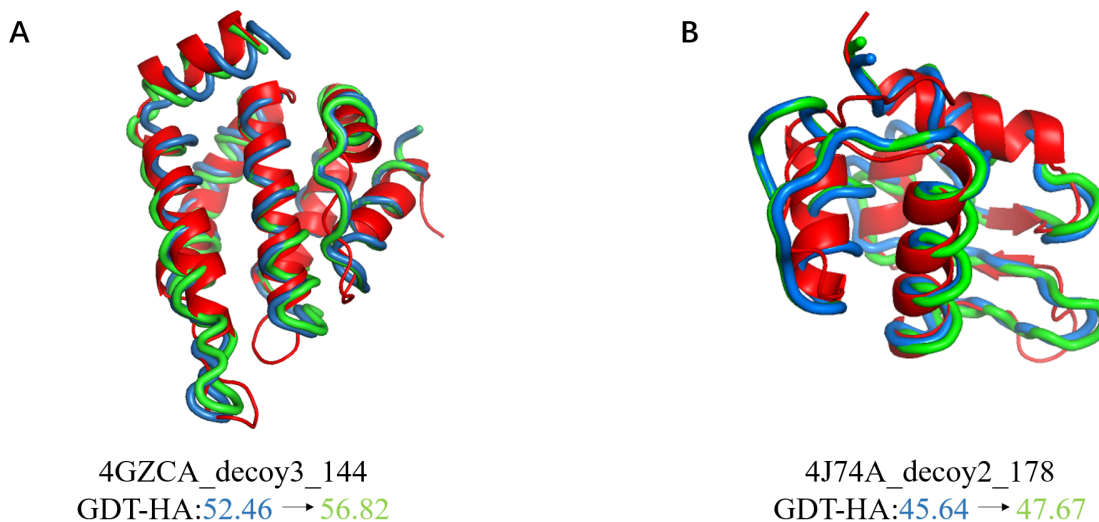

Figure S8: Two examples of GSFE-refinement with larger improvement for learning rate 0.0005 than 0.0001. The starting (red) and refined (green) decoys are overlaid on the experimental (blue) structures with change of GDT-HA at learning rate of 0.0005 indicated. Corresponding change of GDT-HA is 0.57 for 4GZCA\_decoy3\_144 and 0.58 for 4J74A\_decoy2\_178 respectively.

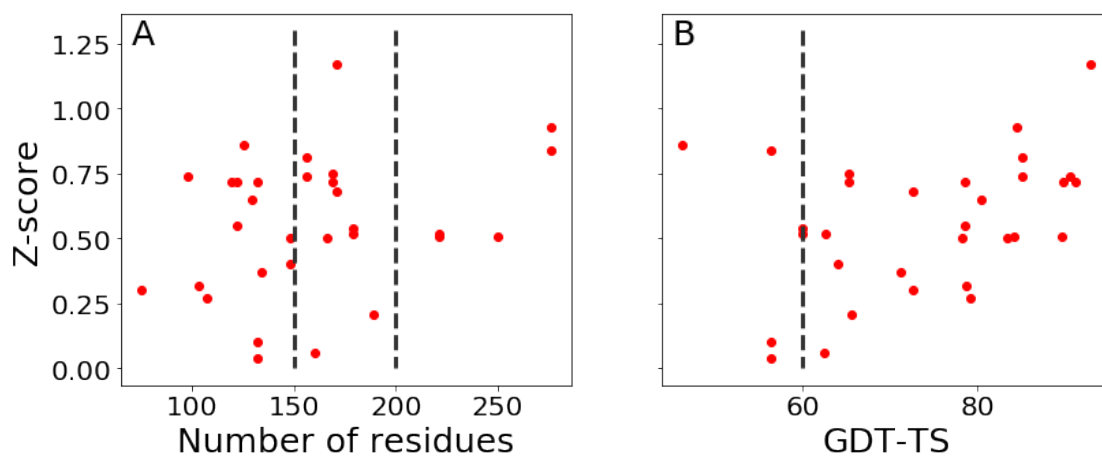

Figure S9: GDT-TS based Z-scores for top 1 model by GSFE-Refinement in CASP14. (A) As a function of the number of residues. (B) As a function of starting GDT-TS score.
